# Supplementary material for: Entwicklung des Alkoholkonsums zu Beginn und während der ersten Wellen der SARS-CoV-2-Pandemie: Ergebnisse einer systematischen Literaturrecherche
Source: Springer Nature journal article supplement (doi:10.1007/s10049-022-01031-x), 2022-04-29
Supplement: MOESM1 [file 20360972]

Zusatzmaterial zum Beitrag „Entwicklung des Alkoholkonsums zu Beginn und während der ersten Wellen der SARS-CoV-2-Pandemie. Ergebnisse einer systematischen Literaturrecherche“ von Thielmann B, Böckelmann I, Schumann H (2022) in *Notfall+Rettenungsmedizin*. Beitrag und Zusatzmaterial stehen Ihnen auf [www.springermedizin.de](http://www.springermedizin.de) zur Verfügung. Bitte geben Sie dort den Beitragstitel in die Suche ein.

Tabelle: Übersicht der Artikel zum Thema Alkoholkonsum in Pandemiezeiten

| Autoren <sup>t</sup>       | Land               | Anzahl N                                  | Verteilung (Frauen♀/ Männer♂), | Alter (Jahren)  | Zeitraum                | Fragebogen Alkohol-Konsum           | Prävalenz oder Konsum des Alkoholkonsum (A.)                                                                                                                        |
|----------------------------|--------------------|-------------------------------------------|--------------------------------|-----------------|-------------------------|-------------------------------------|---------------------------------------------------------------------------------------------------------------------------------------------------------------------|
| <b>Originalarbeiten</b>    |                    |                                           |                                |                 |                         |                                     |                                                                                                                                                                     |
| <b>Ahmed, 2020 [1]</b>     | China              | 1.074                                     | 46,8% ♀, 53,2% ♂               | 14-68, 54±11,13 | n. b.                   | AUDIT                               | ↑ riskanter A. bei 29,1% und gefährlicher A. bei 9,5% 1,6% Abhängigkeit. ♂:♀ 6:1                                                                                    |
| <b>Alladio, 2021 [2]</b>   | Italien            | >1.000 pro Erhebung                       | n. b.                          | n. .b.          | 2019<br>05/20<br>07/20  | Haaranalyse Ethylglucuronide (EtG). | 05/19->05/20: geringer A. bei 60->79%, moderater A. bei 28->14%, exzessiver A. 12->7%; 05/20->07/20: geringer A. 79->79%, moderater A. 14->13%, exzessiver A. 7->9% |
| <b>Avery, 2020 [5]</b>     | USA                | 3.989                                     | 69,2% ♀, 30,8% ♂               | n. b.           | 03/20 - 05/20           | n. s. F.                            | ↑ A. bei 14,3% der Befragten; bei Stress Anstieg A. OR 1,37 (p<0.001); bei Angst OR 1,42 (p<0.001).                                                                 |
| <b>Benschop, 2021 [10]</b> | Niederlande        | 5.176                                     | 48,9% ♀, 50,6% ♂               | 46,5%<br>18-24  | 2019<br>05/20-<br>10/20 | n. s. F.                            | ↑ Tages- und Wochenmenge: 4,3->4,8*** 20,8->22,3***<br>↑ bei 32,1%, ↔ bei 21,2%, ↓ bei 29,1% ∅ bei 11,3%                                                            |
| <b>Boni de, 2021 [11]</b>  | Brasilien, Spanien | N=22.785, Brasilien 19.256, Spanien 3.529 | 68,9% ♀, 31,1% ♂               | 44,3% > 41      | 04/20- 05/20            | AUDIT-C                             | Prävalenz 43,3% (45,6% Brasilien, 30,8% in Spanien)                                                                                                                 |

|                                       |                                          |                              |                                                                  |                   |                               |          |                                                                                                                    |
|---------------------------------------|------------------------------------------|------------------------------|------------------------------------------------------------------|-------------------|-------------------------------|----------|--------------------------------------------------------------------------------------------------------------------|
| <b>Bonny-Noach, 2021 [12]</b>         | Israel                                   | N= 750,<br>n1=427,<br>n2=323 | 72,8% ♀, 27,2% ♂                                                 | 29,8±11,8         | 03-05/20<br>10-11/20          | n. s. F. | ♂>♀*** (p<0,001). 2>1 Sperrungen*<br>↑ Binge-Drinking***                                                           |
| <b>Boschuetz, 2020 [13]</b>           | USA                                      | 407                          | 83,5% ♀, 16,3% ♂,                                                | ab 18             | bis 04/20                     | AUDIT-C  | Score 3 → 4. ♀ (*) bei Nichtabhängigen                                                                             |
| <b>Bramness, 2021 [14]</b>            | Norwegen                                 | 1.200                        |                                                                  | >18               | 06/20-<br>07/20               | n. s. F. | ↑ bei 13,3%; ♀>♂***, ↔ bei 56,8%, ↓ bei 29,9%; jüngere>mittlere>ältere***                                          |
| <b>Charles, 2021 [16]</b>             | USA                                      | 385                          | 87,4% ♀, 11,9% ♂<br>Studenten                                    |                   | 09-11/19<br>04/20<br>10-11/20 | AUDIT    | Score: t1: 3,29, t2: 4,14 und t3: 3,11                                                                             |
| <b>Carpasso, 2021 [15]</b>            | USA                                      | 10.780                       | n. b.                                                            | >18               | 03/20 und<br>04/20            | n. s. F. | ↑ bei 29%, ↔ bei 51,2% , ↓ bei 19,8%                                                                               |
| <b>Eastman, 2021 [19]</b>             | USA                                      | 6.548                        | 53,5% ♀, 46,5% ♂                                                 | >55,<br>67,7±0,2; | 03-04/20                      | n. s. F. | ↑ bei 10,9%, ↔ bei 37,8%, ↓ bei 9,7%                                                                               |
| <b>Every-Palmer et al., 2020 [20]</b> | Neuseeland                               | 2.010                        | 52,9% ♀, 46,8% ♂                                                 | 18-90,<br>Ø 45    | bis 04/20                     | n. s. F. | ↑ bei 22,0%, ↔ bei 59,1%, ↓ bei 18,9%                                                                              |
| <b>Fernandez, 2021 [21]</b>           | Brasilien                                | 1.050                        | 70,6 % ♀, 29,4 % ♂<br>Studenten                                  |                   | 07/20                         | n. s. F. | 5,5% mit Covid-Erk.<br>davon 70,6% A. (Vgl. nicht erk. 15,3% A.); ♂>♀                                              |
| <b>Ferrante, 2020 [22]</b>            | Italien                                  | 7.847                        | 71,3% ♀, 28,7% ♂                                                 | 48,6±13,9         | bis 06/20                     | n. s. F. | ↑ bei 17,3%, 23% ♂ (*), 15,1% ♀                                                                                    |
| <b>Garcia-Cerde, 2021 [24]</b>        | Lateinamerika,<br>Karibik (33<br>Länder) | 12.328                       | 65,9% ♀, 34,1% ♂                                                 | 38,1±12,8         | 05-06/20                      | n. s. F. | ↓ 77,5%->65,0%,<br>Online-Trinken ↑ 6,3±16,6 -> 10,4±22,6%                                                         |
| <b>Gavurova, 2021 [25]</b>            | Tschechien,<br>Slowakei                  | CZ: 1.422<br>SK: 1.677       | CZ: 75,5% ♀, 24,5%<br>♂;<br>SK: 63,9% ♀,<br>36,1%,<br>Studenten, | n. b.             | 1. Welle                      | AUDIT    | Score gesamt 6,1±4,67 (0-30), CZ 6,1±4,51 (0-28), SK: 6,1±4,8 (0-30).<br>Alter für CZ neg. ass. mit Alkoholkonsum. |
| <b>Hanafi, 2021 [28]</b>              | Indonesien                               | N=4.584<br>n=436 pos. A.     | 37,7% ♀, 60,3% ♂                                                 | 30,4±6,8          | 04-06/20                      | AUDIT    | Prävalenz 9%; Score 3,5 ± 4,7.<br>↑ bei 25,7%, ↔ bei 44,5%, ↓ bei 29,8% Ältere<br>und Männer tranken mehr*         |

|                                |             |                        |                                               |                                      |                                       |          |                                                                                                                                                                      |
|--------------------------------|-------------|------------------------|-----------------------------------------------|--------------------------------------|---------------------------------------|----------|----------------------------------------------------------------------------------------------------------------------------------------------------------------------|
| <b>Hennein, 2020 [29]</b>      | USA         | 1.132                  | 71,4% ♀, 28,3% ♂<br>medizinisches Personal    | ab 18                                | 05/20                                 | AUDIT-C  | 42,6% mit Alkoholkonsumstörung, Score 4,8                                                                                                                            |
| <b>Huckle, 2020 [30]</b>       | Neuseeland  | 2.132                  | 78,6% ♀, 21,4% ♂                              | ab 18                                | 04-05/20                              | n. s. F. | ↑ bei 46,7%, ↔ bei 27,8%, ↓ bei 25,5%                                                                                                                                |
| <b>Jaffe, 2021 [31]</b>        | USA         | 263                    | 51,1% ♀, 38,8% ♂<br>Studenten                 | 20,5±2,5                             | SS 2018<br>SS 2019<br>SS 2020         | TLFB     | ↑ bei 16,5%, ↔ bei 43,3%, ↓ bei 40,5%                                                                                                                                |
| <b>Killgore, 2020 [33]</b>     | USA         | 5.931                  | 53,7% ♀, 46,3% ♂                              | 18-84,<br>36,3±12,1                  | 04-09/20                              | AUDIT    | 3.9 % in April → 17.4% in September in allen Gruppen (gefährlich, schädigend, abhängig)                                                                              |
| <b>Koopmann, 2021 [34]</b>     | Deutschland | 3.245                  | 63,9% ♀, 35,8% ♂                              | 18->65                               | 04-05/20                              | n. s. F. | ↑ bei 35,5%, ↔ bei 42,9%, ↓ bei 21,3%<br>Alter 25–34/35-44 mehr als andere Altersgruppen.                                                                            |
| <b>Levy, 2021 [35]</b>         | Israel      | n1=477, n2=35          | 72,9% ♀, 27,1% ♂                              | n. b.                                | 1.Welle (5/20);<br>2.Welle (10-11/20) | n. s. F. | Signifikante Unterschiede im Alkoholkonsum in Abhängigkeit von der COVID-19-Dauer. ♂>♀                                                                               |
| <b>Manthey, 2021 [36]</b>      | EU (D)      | 35.753                 | 52,1% ♀, 47,2% ♂                              | > 18                                 | 04-07/20                              | AUDIT-C  | Score 4,5; 17,8% mit Score > 8.<br>↑ bei 10 %<br>Relevanter Anstieg der Häufigkeit des Alkoholkonsums für Deutschland und UK im Vergleich zu allen anderen Ländern). |
| <b>Martínez-Cao, 2021 [37]</b> | Spanien     | 21.207                 | 69,9% ♀, 30,1% ♂                              | 39,7±14,0                            | 03/20                                 | n. s. F. | 13,5% berichteten über Alkoholkonsum als Copingstrategie                                                                                                             |
| <b>McKetta, 2021 [38]</b>      | USA         | n1= 8.021<br>n2=20.038 | n1:57,9% ♀, 42,1% ♂,<br>n2: 57,6% ♀, 42,4 % ♂ | n1:<br>52,2±15,7<br>n2:<br>52,8±16,1 | 03/20 und<br>05-06/20                 | n. s. F. | ↑ der Trinktage im Verlauf der Pandemie***                                                                                                                           |
| <b>Minhas, 2021 [39]</b>       | Canada      | n1=730,<br>n2=473      | 58,3% ♀, 41,7% ♂                              | 23,8±1,2                             | 2017<br>06-07/20                      | n. s. F. | ↓ des starken Alkoholkonsums*, Tage mit starkem Alkoholkonsum**                                                                                                      |

|                                   |             |                               |                                                   |                        |                       |          |                                                                                                                                              |
|-----------------------------------|-------------|-------------------------------|---------------------------------------------------|------------------------|-----------------------|----------|----------------------------------------------------------------------------------------------------------------------------------------------|
| <b>Mongeau-Pérusse, 2021 [40]</b> | Canada      | 847                           | 77,8% ♀, 22,2% ♂<br>42,5 %<br>Gesundheitspersonal |                        | 05-06/20              | n. s. F. | ↑ des täglichen Alkoholkonsums ***<br>Gesundheitspersonal konsumierte weniger hochprozentige Alkoholprodukte während der Begrenzungen        |
| <b>Oksanen, 2020 [42]</b>         | Finnland    | 1.308 (2019),<br>1.081 (2020) | 48,2% ♀, 51,8 ♂                                   | 19-65,<br>3,07±12,7    | 09-10/19;<br>03-04/20 | AUDIT-C  | ↑ bei 25,4% (eher bei Jüngeren 30-45 Jahren),<br>↔ bei 48,02 %,<br>↓ bei 26,62 %                                                             |
| <b>Opara, 2021 [43]</b>           | USA         | 575                           | 55,6% ♀, 44,4% ♂                                  | 27,9±4,1               | 07-10/20              | PACS     | ↑ bei 51,6% der ♂ und bei 48,4% der ♀.<br>23,4% mit positivem COVID-19-Diagnose, davon 47,2 %<br>↑ Alkoholkonsum und 16,7 % nicht zugenommen |
| <b>Price 2020 [45]</b>            | Kanada      | 2.005                         | 50% ♀ + ♂,<br>Online-Spieler                      | 18-24                  | 04/20                 | n. s. F. | ↑ bei 40,7%                                                                                                                                  |
| <b>Ren, 2020 [47]</b>             | China       | 1.172                         | 69,3% ♀, 30,7% ♂                                  | 21,0–<br>37,0,<br>22,0 | 02-03/20              | n. s. F. | ↑ bei 11,3%                                                                                                                                  |
| <b>Rodriguez, 2020 [50]</b>       | USA         | 754                           | 50% ♀ + ♂                                         | 41,7±10,3<br>9         | 04/20                 | n. s. F. | 13% ↑ Anzahl von Getränken,<br>16% ↑ mit schweren Trinktagen,<br>♀>♂                                                                         |
| <b>Schecke, 2021 [52]</b>         | Deutschland | 2813                          | 100% ♀                                            | 18 - >65               | 10-12/20              | n. s. F. | ↑ bei 23%, ↓ bei 18,5%                                                                                                                       |
| <b>Sidor, 2020 [53]</b>           | Polen       | 1.097                         | 95,1% ♀, 4,9% ♂,                                  | 18–71,<br>27,7±9,0     | 04-05/20              | n. s. F. | ↑ bei 14,6%, 8,3 % unsicher,<br>↔ bei 77 %                                                                                                   |
| <b>Suffoletto, 2020 [54]</b>      | USA         | 50                            | 64% ♀, 36% ♂                                      | 18-25,<br>22,2±2,1     | 04/20                 | AUDIT-C  | 1. Woche 44% mit gefährlichem Konsum, nach 2. Woche 29% in 2. Woche, danach ↑ auf 65%                                                        |
| <b>Sun, 2020 [55]</b>             | China       | 6.416                         | 53% ♀, 47% ♂                                      | 28,23±9,2<br>3         | 03/20                 | n. s. F. | ↑31,3% -> 32,7%; 18,7% rückfällig, 1,7% Beginn,<br>↓ bei 1,6 %                                                                               |
| <b>Szajnoga, 2020 [56]</b>        | Polen       | 4.072                         | 84,4% ♀, 15,6 % ♂                                 | 11-77,<br>29,6 ± 9,4   | 04/20                 | n. s. F. | ↑ bei 17,9%, ↔ bei 42,8%, ↓ bei 39,3 %                                                                                                       |

|                                                                                                                                                                                                                                                                                                                                                                                                                                                                    |            |                                |                                              |                                                         |               |          |                                                           |
|--------------------------------------------------------------------------------------------------------------------------------------------------------------------------------------------------------------------------------------------------------------------------------------------------------------------------------------------------------------------------------------------------------------------------------------------------------------------|------------|--------------------------------|----------------------------------------------|---------------------------------------------------------|---------------|----------|-----------------------------------------------------------|
| <b>Wardell, 2020<br/>[57]</b>                                                                                                                                                                                                                                                                                                                                                                                                                                      | Kanada     | 320                            | 45,3% ♀, 54,7% ♂                             | 32,0±9,2                                                | 04-05/2020    | n. s. F. | ↑ Häufigkeit und Intensität (*),<br>↑ alleinigen Trinkens |
| <b>Winkler, 2020<br/>[60]</b>                                                                                                                                                                                                                                                                                                                                                                                                                                      | Tschechien | 3.306 (11/17)<br>3.021 (05/20) | 54%♀, 46% ♂ (2017)<br>52% ♀, 48% ♂<br>(2020) | 2017:<br>48,82 ±<br>17,19,<br>2020:<br>46,84 ±<br>16,02 | 2017<br>05/20 | n. s. F. | ↔ Missbrauch und Abhängigkeit,<br>↑ Binge-Drinking        |
| <p>Anmerkungen:<br/> <sup>†</sup>aus Platzgründen werden nur die Erstautoren genannt; ♀= Frauen, ♂= Männer; OR = Odd Ratios, ∅ = kein<br/> AUDIT = Alcohol Use Disorder Identification Test, AUDIT-C = Alcohol Use Disorders Identification Test—Concise, TLFB = Timeline Follow-Back Interview, PACS = Penn Alcohol Craving Scale<br/> * p&lt;0,05, ** p&lt;0,01 und *** p&lt;0,001<br/> n. b. = nicht berichtet, n. s. F = nicht standardisierter Fragebogen</p> |            |                                |                                              |                                                         |               |          |                                                           |
